# Supplementary material for: Photodissociation of CH2BrCHBrC(O)Cl at 248 nm: probing Br2 as the primary fragment using cavity ring-down spectroscopy
Source: Royal Society of Chemistry journal article supplement (doi:10.1039/d1cp02279b), 2021-01-01

## Supporting Information.

### **Photodissociation of $\text{CH}_2\text{BrCHBrC(O)Cl}$ at 248 nm : Probing $\text{Br}_2$ as Primary Fragment by Cavity Ring-Down Spectroscopy**

Muthiah Balaganesh<sup>1</sup>, Joseph Song<sup>2</sup>, Toshio Kasai<sup>1,4</sup>, and King Cheun Lin<sup>1,3\*</sup>

- <sup>1.</sup> *Department of Chemistry, National Taiwan Univeristy, Taipei 106, Taiwan*
- <sup>2.</sup> *Department of Chemistry, Stony Brook University, 100 Nicolls Road, Stony Brook, New York 11794-3400, USA*
- <sup>3.</sup> *Institute of Atomic and Molecular Sciences, Academia Sinica, Taipei 106, Taiwan*
- <sup>4.</sup> *Institute of Scientific and Industrial Research, Osaka University, Ibaraki, Osaka 567-0047, Japan*

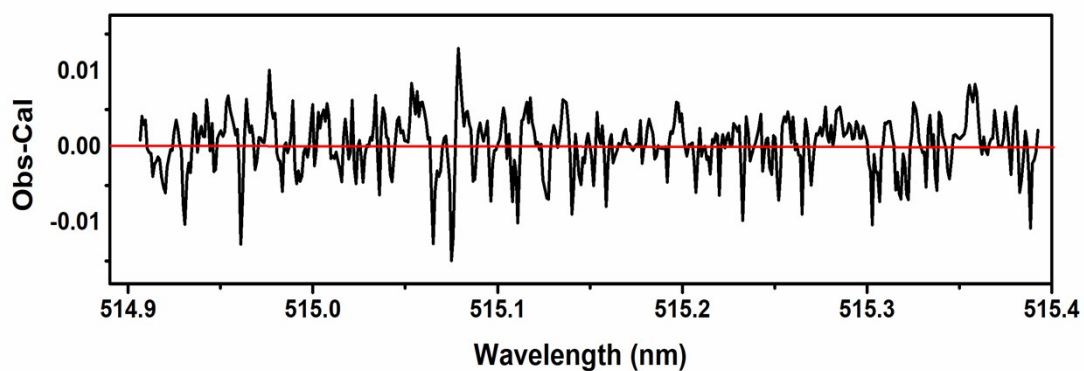

**Fig.SI-1:** The agreement between the experimental spectra and simulated spectra was measured with help of residual spectra as can be seen.

**Table-SI-1:** Coordinates of the optimized geometries (Reactant, transition states and products)

2,3-DBPC:

| Atoms | Coordinates (Angstroms) |          |          |
|-------|-------------------------|----------|----------|
|       | X                       | Y        | Z        |
| C     | -0.57948                | -0.92045 | -0.52561 |
| H     | -0.41869                | -0.50716 | -1.51940 |
| H     | -0.49817                | -2.00534 | -0.54679 |
| C     | 0.37429                 | -0.34236 | 0.49127  |
| H     | 0.22390                 | -0.76832 | 1.48276  |
| C     | 0.31316                 | 1.17135  | 0.63924  |
| O     | 0.31552                 | 1.74195  | 1.67718  |
| Cl    | 0.27576                 | 2.05240  | -0.90427 |
| Br    | -2.39202                | -0.49121 | 0.01860  |
| Br    | 2.18725                 | -0.79441 | -0.04976 |

TS<sub>Br<sub>2</sub></sub>:

| Atoms | Coordinates (Angstroms) |           |           |
|-------|-------------------------|-----------|-----------|
|       | X                       | Y         | Z         |
| C     | -0.095743               | -0.944034 | 1.438647  |
| H     | 0.520485                | -0.895036 | 2.327679  |
| H     | -0.303225               | -1.921231 | 1.022439  |
| C     | -1.002389               | 0.103847  | 1.207016  |
| H     | -1.119817               | 0.902555  | 1.932930  |
| C     | -2.196629               | -0.076897 | 0.338308  |
| O     | -3.219140               | 0.516925  | 0.470690  |
| Cl    | -1.998863               | -1.290335 | -0.949498 |
| Br    | 1.905806                | -0.763053 | -0.039677 |
| Br    | 0.391477                | 1.483524  | -0.269207 |

TS<sub>BrCl</sub>:

| Atoms | Coordinates (Angstroms) |           |           |
|-------|-------------------------|-----------|-----------|
|       | X                       | Y         | Z         |
| C     | 0.328053                | -1.887964 | 0.064737  |
| H     | 0.863740                | -2.207426 | -0.825656 |
| H     | 0.062758                | -2.720684 | 0.715642  |
| C     | 0.979730                | -0.729736 | 0.817835  |
| H     | 1.585364                | -1.005266 | 1.683491  |
| C     | -0.259083               | 0.022397  | 1.285129  |
| O     | -0.707890               | 0.459869  | 2.245169  |
| Cl    | -1.641264               | 1.967112  | -0.338065 |
| Br    | -1.307187               | -0.865783 | -0.450047 |
| Br    | 2.014631                | 0.419650  | -0.315494 |

TS1\_HBr:

| Atoms | Coordinates (Angstroms) |           |           |
|-------|-------------------------|-----------|-----------|
|       | X                       | Y         | Z         |
| C     | 0.769965                | -0.679335 | -0.327589 |
| H     | 0.580818                | -1.340476 | -1.166224 |
| H     | 0.221715                | 0.461110  | -0.628398 |
| C     | -0.162154               | -0.553194 | 0.702472  |
| H     | 0.100124                | -0.152973 | 1.677216  |
| C     | -1.527105               | -1.168202 | 0.632514  |
| O     | -2.146954               | -1.435820 | 1.610278  |
| Cl    | -2.099514               | -1.554920 | -0.987218 |
| Br    | 2.586901                | -0.300721 | -0.006886 |
| Br    | -0.944601               | 1.825204  | -0.051014 |

TS2\_HBr:

| Atoms | Coordinates (Angstroms) |           |           |
|-------|-------------------------|-----------|-----------|
|       | X                       | Y         | Z         |
| C     | 0.389144                | -0.050840 | 1.345795  |
| H     | 0.931449                | 0.796702  | 1.749676  |
| H     | 0.445835                | -0.999763 | 1.866363  |
| C     | -0.569294               | 0.128816  | 0.329553  |
| H     | 0.558910                | -0.168619 | -0.368147 |
| C     | -0.995856               | 1.469679  | -0.142187 |
| O     | -2.018572               | 1.728159  | -0.683342 |
| Cl    | 0.252292                | 2.725481  | 0.103463  |
| Br    | 2.255438                | -0.687887 | -0.227618 |
| Br    | -1.770311               | -1.285618 | -0.022067 |

TS\_HCl:

| Atoms | Coordinates (Angstroms) |
|-------|-------------------------|
|-------|-------------------------|

|    | X         | Y         | Z         |
|----|-----------|-----------|-----------|
| C  | 0.640790  | -1.204854 | -0.375191 |
| H  | 0.541681  | -2.074614 | 0.272719  |
| H  | 0.545152  | -1.494796 | -1.420417 |
| C  | -0.395317 | -0.136527 | -0.088711 |
| H  | -0.343581 | 0.879870  | -0.714942 |
| C  | -0.254231 | 0.449408  | 1.216550  |
| O  | -0.177397 | 0.849482  | 2.266176  |
| Cl | -0.368343 | 2.679094  | -0.636593 |
| Br | 2.400215  | -0.448771 | -0.119358 |
| Br | -2.200492 | -0.816917 | -0.165230 |

P1\_TS\_Br<sub>2</sub>:

| Atoms | Coordinates (Angstroms) |           |          |
|-------|-------------------------|-----------|----------|
|       | X                       | Y         | Z        |
| C     | 1.717702                | -1.160235 | 0.000000 |
| H     | 2.761471                | -1.455807 | 0.000000 |
| H     | 0.969004                | -1.945252 | 0.000000 |
| C     | 1.384038                | 0.129247  | 0.000000 |
| H     | 2.128158                | 0.920557  | 0.000000 |
| C     | 0.000000                | 0.656209  | 0.000000 |
| O     | -0.282087               | 1.811688  | 0.000000 |
| Cl    | -1.306611               | -0.574372 | 0.000000 |

P1\_TS\_BrCl:

| Atoms | Coordinates (Angstroms) |           |           |
|-------|-------------------------|-----------|-----------|
|       | X                       | Y         | Z         |
| C     | 1.407234                | 1.248805  | -0.301422 |
| H     | 1.077794                | 1.451644  | -1.317806 |
| H     | 1.970568                | 2.047852  | 0.174016  |
| C     | 0.455691                | 0.435665  | 0.616729  |
| H     | 0.418311                | 0.708559  | 1.665784  |
| C     | 1.670222                | -0.158503 | 0.048641  |
| O     | 2.335408                | -1.140020 | -0.090906 |
| Br    | -1.238537               | -0.121248 | -0.056527 |

P1\_TS1\_HBr:

| Atoms | Coordinates (Angstroms) |           |           |
|-------|-------------------------|-----------|-----------|
|       | X                       | Y         | Z         |
| C     | -0.366960               | -0.238663 | 0.000132  |
| H     | -0.043022               | -1.271938 | 0.000549  |
| C     | 0.482413                | 0.787456  | -0.000219 |
| H     | 0.152896                | 1.821479  | -0.000586 |
| C     | 1.948726                | 0.618975  | 0.000039  |
| O     | 2.731692                | 1.513758  | 0.000149  |
| Cl    | 2.536534                | -1.077234 | -0.000057 |
| Br    | -2.213416               | -0.038664 | 0.000003  |

P1\_TS2\_HBr:

| Atoms | Coordinates (Angstroms) |           |          |
|-------|-------------------------|-----------|----------|
|       | X                       | Y         | Z        |
| C     | 0.266842                | 1.855947  | 0.000000 |
| H     | 1.290224                | 2.210839  | 0.000000 |
| H     | -0.535688               | 2.584333  | 0.000000 |
| C     | 0.000000                | 0.551728  | 0.000000 |
| C     | 1.038227                | -0.524154 | 0.000000 |
| O     | 0.820108                | -1.690023 | 0.000000 |
| Cl    | 2.726330                | 0.057479  | 0.000000 |
| Br    | -1.756955               | -0.101522 | 0.000000 |

P1\_TS\_HCl:

| Atoms | Coordinates (Angstroms) |           |           |
|-------|-------------------------|-----------|-----------|
|       | X                       | Y         | Z         |
| C     | -0.510497               | -0.954421 | 0.000333  |
| H     | -0.413147               | -1.576992 | -0.890792 |
| H     | -0.413528               | -1.576653 | 0.891724  |
| C     | 0.497071                | 0.148566  | 0.000226  |
| C     | 0.201165                | 1.434303  | 0.000153  |
| O     | -0.009793               | 2.577479  | 0.000000  |
| Br    | -2.319814               | -0.264742 | -0.000080 |
| Br    | 2.313487                | -0.342026 | -0.000069 |

Br<sub>2</sub>:

| Atoms | Coordinates (Angstroms) |          |           |
|-------|-------------------------|----------|-----------|
|       | X                       | Y        | Z         |
| Br    | 0.000000                | 0.000000 | 1.143769  |
| Br    | 0.000000                | 0.000000 | -1.143769 |

BrCl:

| Atoms | Coordinates (Angstroms) |          |           |
|-------|-------------------------|----------|-----------|
|       | X                       | Y        | Z         |
| Cl    | 0.000000                | 0.000000 | -1.448763 |
| Br    | 0.000000                | 0.000000 | 0.703685  |

HBr:

| Atoms | Coordinates (Angstroms) |          |           |
|-------|-------------------------|----------|-----------|
|       | X                       | Y        | Z         |
| Br    | 0.000000                | 0.000000 | 0.039264  |
| H     | 0.000000                | 0.000000 | -1.374253 |

HCl:

| Atoms | Coordinates (Angstroms) |          |           |
|-------|-------------------------|----------|-----------|
|       | X                       | Y        | Z         |
| H     | 0.000000                | 0.000000 | -1.209596 |
| Cl    | 0.000000                | 0.000000 | 0.071153  |

**Table-SI-3:** Vibrational frequencies ( $\text{cm}^{-1}$ ) of stationary points

| 2,3-DBPC | TS Br <sub>2</sub> | TS BrCl | TS1 HBr  | TS2 HBr  | TS HCl  |
|----------|--------------------|---------|----------|----------|---------|
| 68.74    | -1201.56           | -371.67 | -1788.00 | -1714.55 | -608.63 |
| 83.24    | 40.92              | 57.66   | 64.57    | 58.41    | 25.64   |
| 138.73   | 61.40              | 80.54   | 75.23    | 66.04    | 65.74   |
| 169.56   | 101.21             | 102.91  | 103.45   | 107.24   | 102.39  |
| 208.69   | 129.29             | 121.39  | 144.80   | 201.76   | 132.41  |
| 268.11   | 199.22             | 179.73  | 222.69   | 274.75   | 164.80  |
| 450.71   | 262.96             | 196.77  | 285.36   | 307.65   | 200.16  |
| 514.51   | 362.87             | 239.44  | 328.82   | 321.68   | 276.93  |
| 552.69   | 467.62             | 327.26  | 451.34   | 354.21   | 354.53  |
| 646.35   | 511.70             | 527.25  | 496.69   | 468.87   | 525.15  |
| 675.31   | 616.57             | 611.90  | 612.05   | 626.75   | 663.10  |
| 781.15   | 653.27             | 657.17  | 648.06   | 659.18   | 701.20  |
| 891.50   | 751.11             | 832.79  | 731.33   | 708.72   | 796.31  |
| 1055.06  | 870.44             | 861.62  | 830.15   | 762.54   | 902.74  |
| 1152.85  | 954.20             | 1027.25 | 951.39   | 927.68   | 979.49  |
| 1198.29  | 1007.40            | 1133.18 | 1084.38  | 967.73   | 1182.12 |
| 1229.25  | 1156.96            | 1191.45 | 1123.84  | 1057.48  | 1208.27 |
| 1293.50  | 1203.90            | 1264.43 | 1216.82  | 1178.20  | 1250.32 |
| 1364.76  | 1381.04            | 1364.95 | 1261.33  | 1213.13  | 1291.39 |
| 1490.87  | 1496.03            | 1492.09 | 1295.36  | 1371.60  | 1488.34 |
| 1931.55  | 1892.35            | 2244.33 | 1546.70  | 1514.83  | 1829.80 |
| 3156.26  | 3214.28            | 3147.20 | 1897.67  | 1916.41  | 2365.74 |
| 3180.25  | 3235.95            | 3220.14 | 3239.80  | 3210.20  | 3139.67 |
| 3230.05  | 3323.02            | 3251.72 | 3249.60  | 3324.47  | 3215.09 |

| P1 TS Br <sub>2</sub> | P1 TS BrCl | P1 TS1 HBr | P1 TS2 HBr | P1 TS HCl |
|-----------------------|------------|------------|------------|-----------|
| 93.75                 | 84.64      | 132.75     | 40.47      | 90.19     |
| 268.39                | 209.64     | 149.56     | 202.98     | 122.37    |
| 450.88                | 271.59     | 229.27     | 277.18     | 161.52    |
| 455.75                | 525.13     | 243.76     | 368.55     | 205.08    |
| 505.97                | 551.96     | 424.42     | 385.67     | 311.87    |
| 621.56                | 648.69     | 485.72     | 479.97     | 526.21    |
| 775.42                | 669.61     | 635.18     | 634.69     | 589.42    |
| 960.91                | 869.14     | 641.17     | 654.45     | 672.14    |
| 1008.35               | 1052.43    | 829.10     | 713.03     | 723.12    |
| 1033.38               | 1148.86    | 882.84     | 777.49     | 940.98    |
| 1179.90               | 1208.72    | 991.45     | 973.11     | 1073.94   |

|         |         |         |         |         |
|---------|---------|---------|---------|---------|
| 1311.42 | 1268.85 | 1147.87 | 1006.27 | 1191.13 |
| 1448.24 | 1448.05 | 1244.61 | 1211.65 | 1295.87 |
| 1732.76 | 1497.19 | 1320.70 | 1431.43 | 1434.69 |
| 1901.20 | 2260.07 | 1698.11 | 1707.60 | 1497.42 |
| 3193.79 | 3149.62 | 1908.96 | 1919.90 | 2282.79 |
| 3215.10 | 3219.44 | 3242.71 | 3198.12 | 3117.60 |
| 3291.09 | 3237.23 | 3279.91 | 3298.25 | 3177.34 |

|                 |        |         |         |
|-----------------|--------|---------|---------|
| Br <sub>2</sub> | BrCl   | HBr     | HCl     |
| 350.79          | 464.44 | 2656.78 | 3000.03 |

**Fig-SI-2:** UV-visible spectrum of 2,3-DBPC at various concentrations

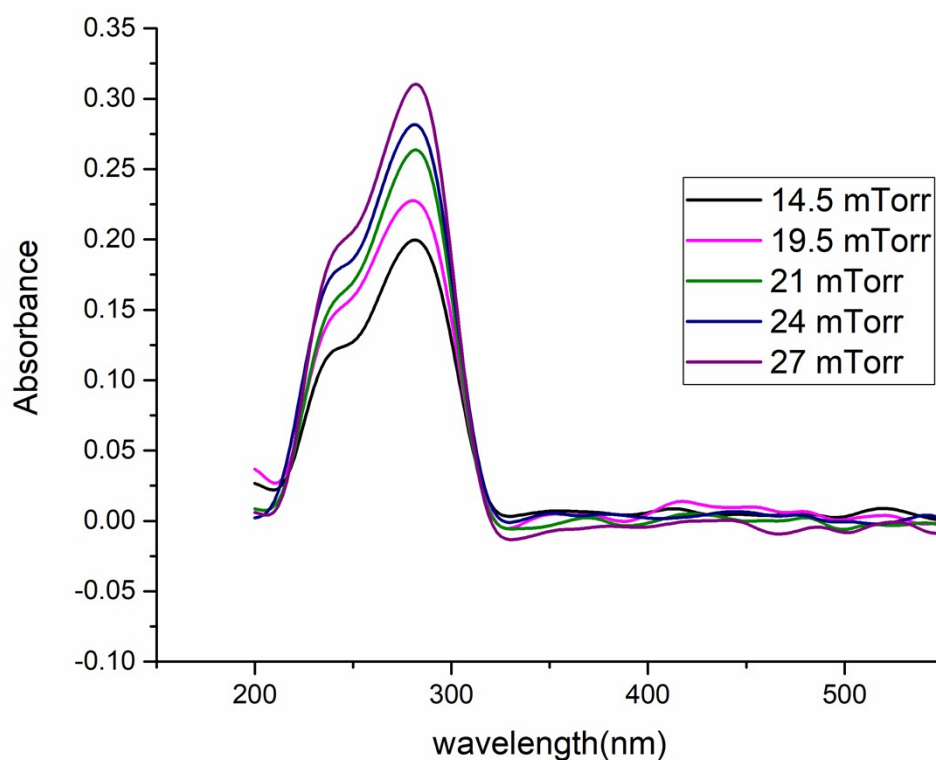

**Fig-SI-3:** Plot of absorbance of 2,3-DBPC at 248nm at various concentration of 2,3-DBPC

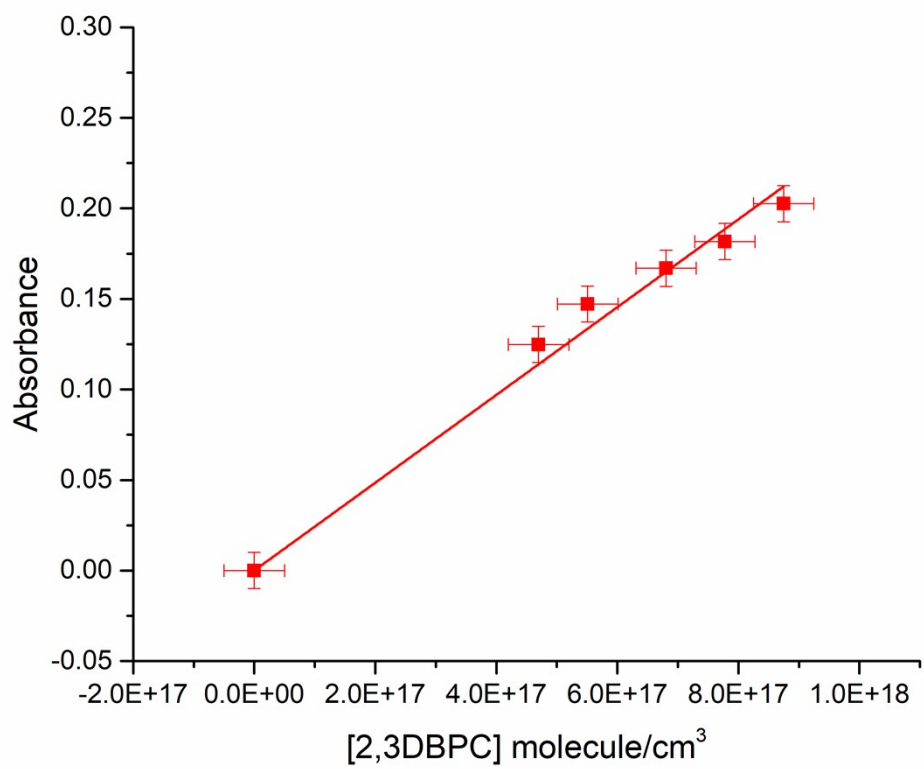

Supplement: d1cp02279b1.pdf [file d1cp02279b1.pdf]
